# Supplementary material for: Global analysis of ZNF217 chromatin occupancy in the breast cancer cell genome reveals an association with ERalpha
Source: PubMed Central journal article supplement (PMC4082627; doi:10.1186/1471-2164-15-520), 2014-06-24
Supplement: 12864_2014_6197_MOESM3_ESM.pdf [file 12864_2014_6197_MOESM3_ESM.pdf]

**A**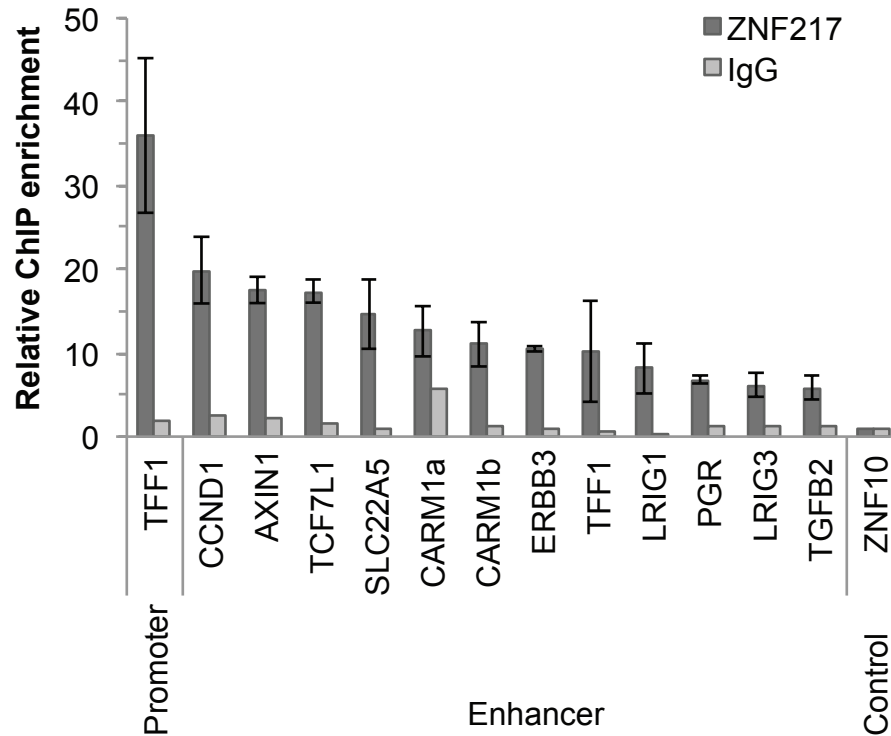**B**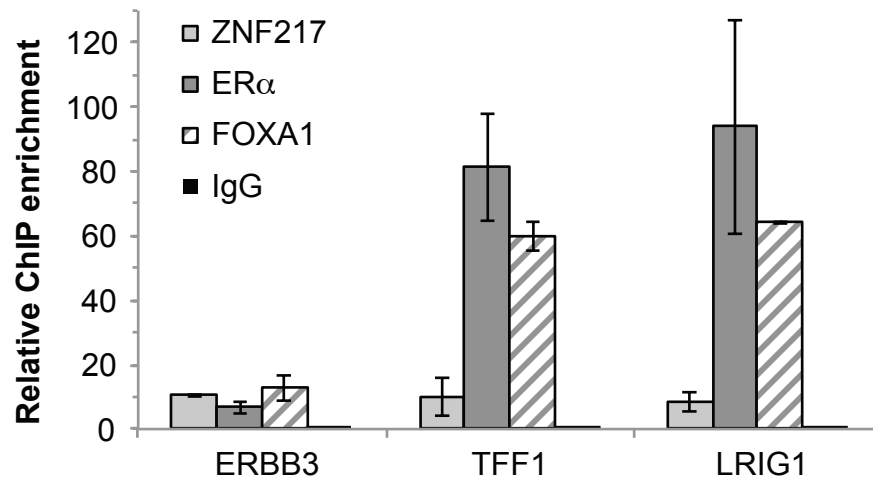

**Supplemental Figure 1.** ChIP-qPCR confirming TF binding sites identified by ChIP-seq.

**(A)** Panel of ZNF217-bound distal sites confirmed by ChIP-qPCR. **(B)** Relative TF ChIP enrichment at the ER $\alpha$  target genes *ERBB3*, *TFF1*, and *LRIG1*. ChIP assays were performed on two independent biological replicates using the following antibodies ZNF217, ER $\alpha$  and FOXA1. IgG was used as a control. Relative DNA enrichment was calculated relative to DNA input and using the non-target ZNF10 locus as a negative control.
