# Supplementary material for: Global analysis of ZNF217 chromatin occupancy in the breast cancer cell genome reveals an association with ERalpha
Source: PubMed Central journal article supplement (PMC4082627; doi:10.1186/1471-2164-15-520), 2014-06-24
Supplement: 12864_2014_6197_MOESM4_ESM.pdf [file 12864_2014_6197_MOESM4_ESM.pdf]

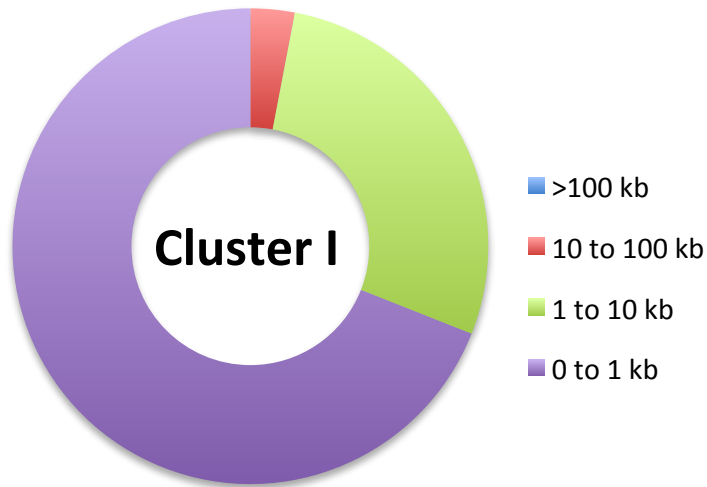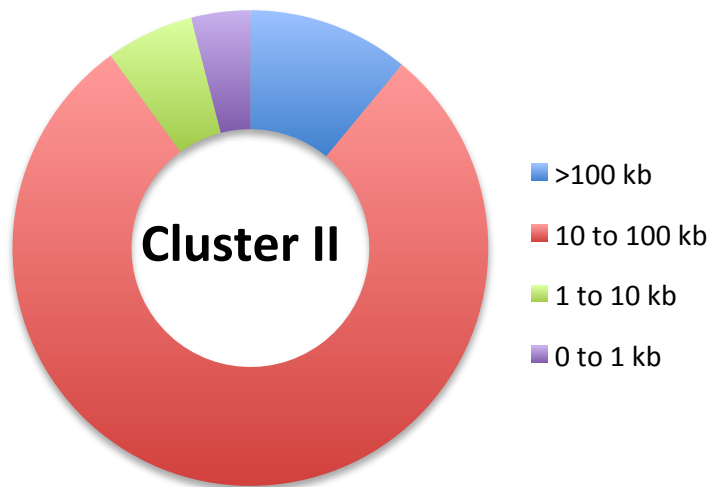

**Supplemental Figure 2:** Location Analysis of ZNF217 epigenomic clusters

Location analysis of the cluster I and II regions from **Figure 1B**. The fraction of the ZNF217 binding sites found in cluster I (top chart) or cluster II (below chart) relative to Refseq genes is shown.
