# Supplementary material for: Global analysis of ZNF217 chromatin occupancy in the breast cancer cell genome reveals an association with ERalpha
Source: PubMed Central journal article supplement (PMC4082627; doi:10.1186/1471-2164-15-520), 2014-06-24
Supplement: 12864_2014_6197_MOESM6_ESM.pdf [file 12864_2014_6197_MOESM6_ESM.pdf]

Forward

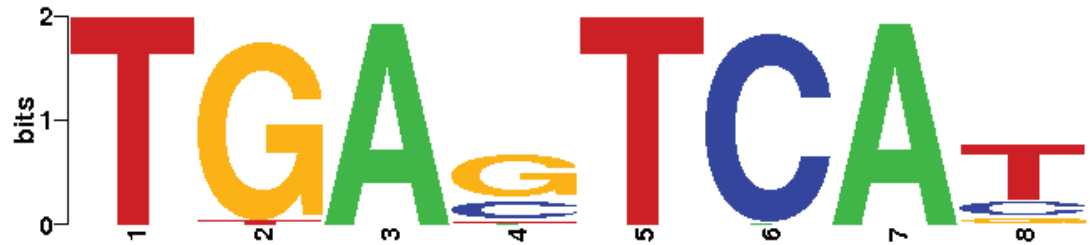

Reverse complement

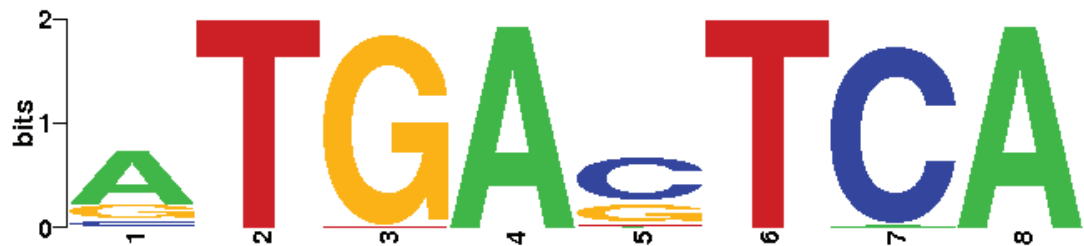

|                                           |         |
|-------------------------------------------|---------|
| p-value:                                  | 1e-1278 |
| Number of Target Sequences with motif     | 4083    |
| Percentage of Target Sequences with motif | 21.53%  |

**Supplemental Figure 3: *de novo* ZNF217 motif**

Identification of *de novo* motif for ZNF217 binding sites in MCF7 cells. HOMER *de novo* motif analysis using the central most 100 base pairs of all 18,965 ChIP-seq binding regions reveal the indicated motif (shown in both forward and reverse complement).
