# Supplementary material for: Global analysis of ZNF217 chromatin occupancy in the breast cancer cell genome reveals an association with ERalpha
Source: PubMed Central journal article supplement (PMC4082627; doi:10.1186/1471-2164-15-520), 2014-06-24
Supplement: 12864_2014_6197_MOESM7_ESM.pdf [file 12864_2014_6197_MOESM7_ESM.pdf]

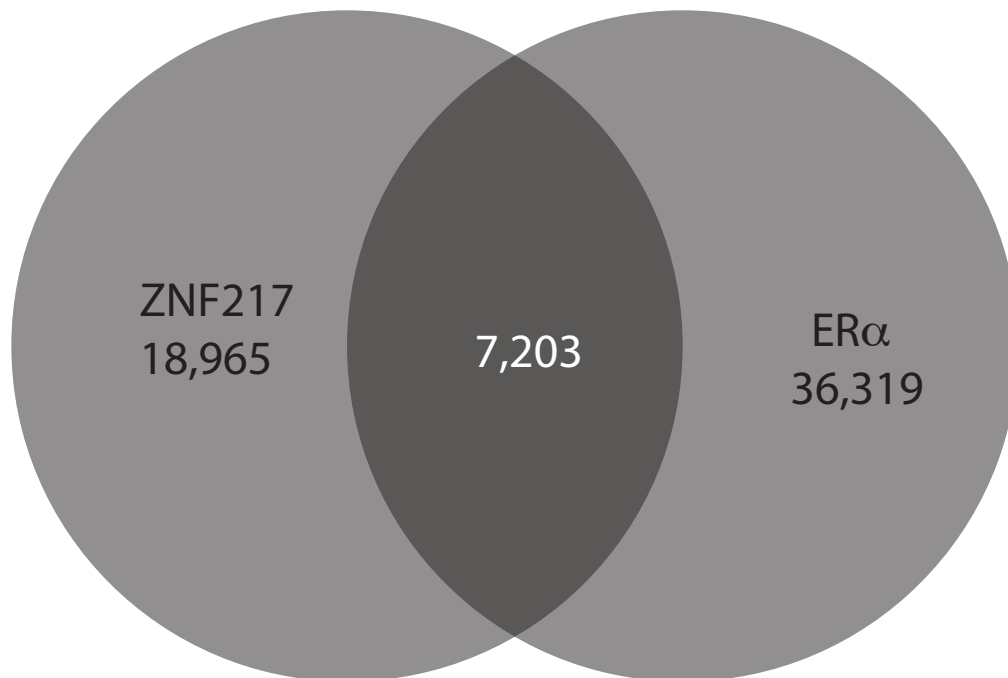

**Supplemental Figure 4:** Venn diagram for ZNF217 and ER binding overlap.

Overlap analysis of ZNF217 and ERα ChIP-seq binding sites in MCF7 cells. The Venn diagram illustrates the total number of genomic regions shared between these two factors (overlapping by at least 1 base pair). The total number of identified sites is indicated below each factor's name.
