# Supplementary material for: Global analysis of ZNF217 chromatin occupancy in the breast cancer cell genome reveals an association with ERalpha
Source: PubMed Central journal article supplement (PMC4082627; doi:10.1186/1471-2164-15-520), 2014-06-24
Supplement: 12864_2014_6197_MOESM11_ESM.pdf [file 12864_2014_6197_MOESM11_ESM.pdf]

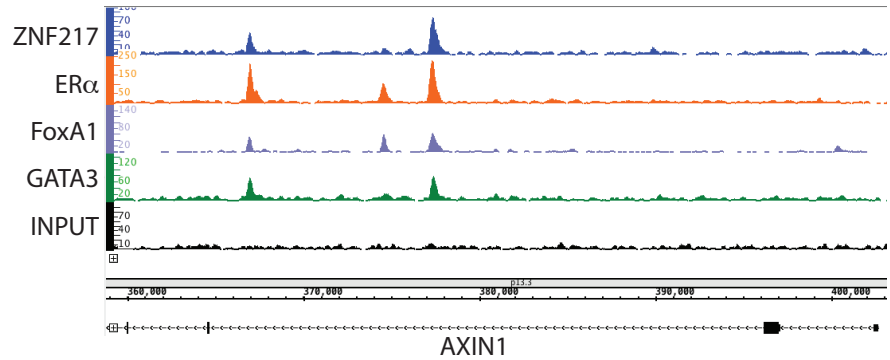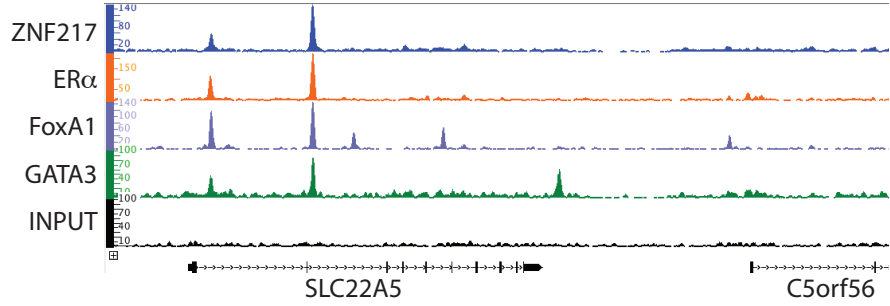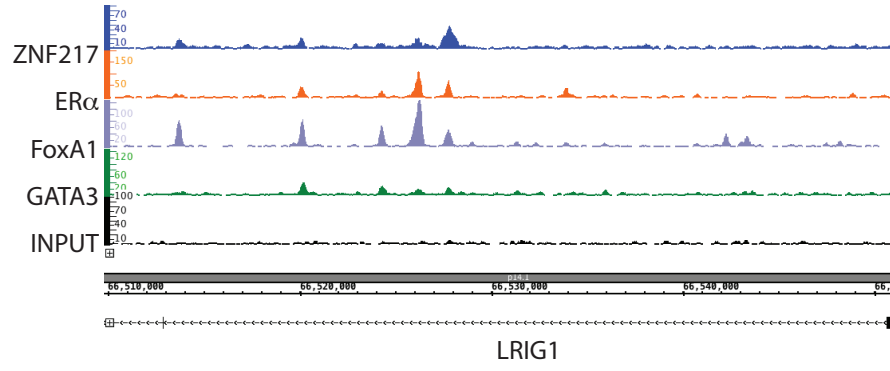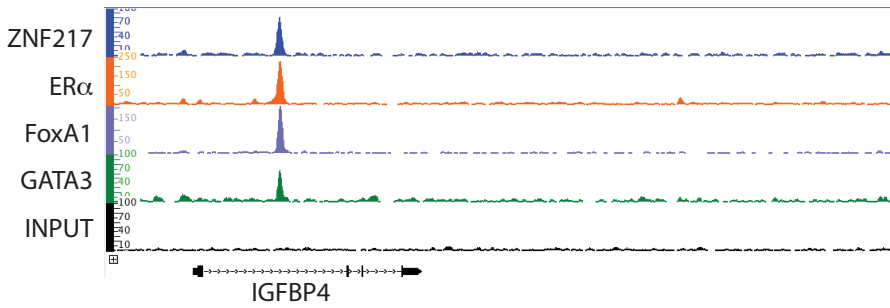

**Supplemental Figure 6:** Integrated Genome Browser snapshots of 4 genes bound by ZNF217, ERα, FOXA1 and GATA3. Co-bound regions are shown for *LRIG1*, *AXIN1*, *SLC22A5*, and *IGFBP4*.
