# Supplementary material for: Global analysis of ZNF217 chromatin occupancy in the breast cancer cell genome reveals an association with ERalpha
Source: PubMed Central journal article supplement (PMC4082627; doi:10.1186/1471-2164-15-520), 2014-06-24
Supplement: 12864_2014_6197_MOESM13_ESM.pdf [file 12864_2014_6197_MOESM13_ESM.pdf]

Frietze, Supplemental Figure 7

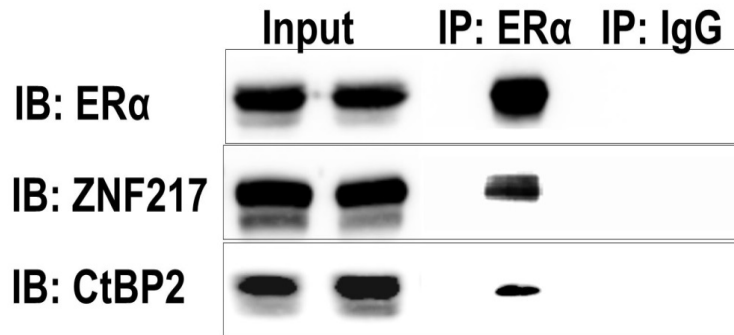

**Supplemental Figure 7. ER co-immunoprecipitation with ZNF217 and CtBP2.**

Co-immunoprecipitation of endogenous ZNF217, ER $\alpha$  and CtBP2 from MCF7 nuclear extracts. Immunoprecipitation experiments with ER $\alpha$  antibody to co-IP ZNF217 were blotted with corresponding antibodies. CtBP2 is a ZNF217-binding partner. Input from nuclear extracts is shown in the two left lanes.
