# Supplementary material for: Global analysis of ZNF217 chromatin occupancy in the breast cancer cell genome reveals an association with ERalpha
Source: PubMed Central journal article supplement (PMC4082627; doi:10.1186/1471-2164-15-520), 2014-06-24
Supplement: 12864_2014_6197_MOESM14_ESM.pdf [file 12864_2014_6197_MOESM14_ESM.pdf]

## Frietze, Supplemental Figure 8

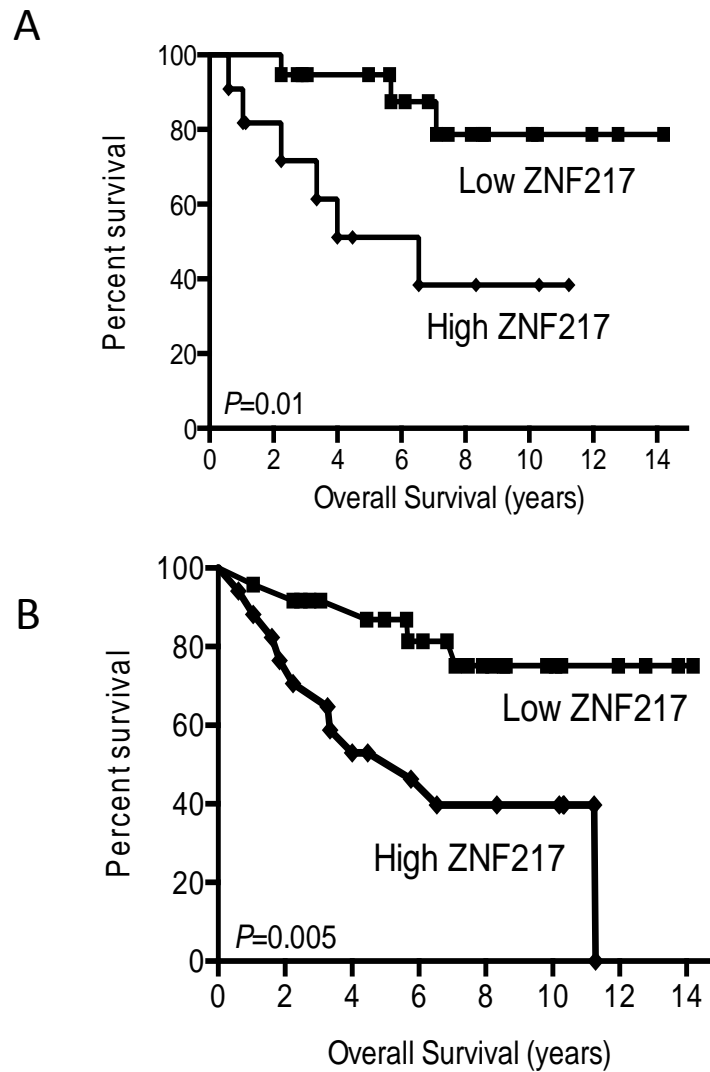

### Supplemental Figure 8. Basal and ER- patient cohorts

**A)** Overall survival of basal subtype patients (n=30) based on ZNF217 expression from primary tumors for low (n=19) versus high (n=11) ZNF217 expression (P=0.01; Logrank). **B)** Overall survival in ER- patients based on ZNF217 expression for low ZNF217 (n=24) versus high ZNF217 (n=17) (P=0.005; Logrank). Data was sorted first by ZNF217 expression using the median cutoff. Then the data was sorted to identify the ZNF217 high patients and the ZNF217 low patients who were ER- or basal patients. Datasets from Chin et al., 2006.
